## **Seizures start as silent microseizures by neuronal ensembles**

Michael Wenzel MD<sup>1</sup>, Jordan P. Hamm PhD<sup>1</sup>, Darcy S. Peterka PhD<sup>1</sup>, and Rafael Yuste MD PhD<sup>1</sup>

<sup>1</sup> Neurotechnology Center, Department of Biological Sciences, Columbia University, New York, NY 10027, USA

Running Head: Two-photon imaging of seizure emergence and spread

Correspondence to:

Michael Wenzel

902 NWC Building 550 West 120 Street, Box 4822, New York, NY, 10027.

Email: [michaelwenzel2946@gmail.com](mailto:michaelwenzel2946@gmail.com)

Phone: +1 212 854 5023

**Conflict of Interest:** The authors declare no competing financial interests

## Abstract

1 Understanding seizure formation and spread remains a critical goal of epilepsy research. While  
2 many studies have documented seizure spread, it remains mysterious how they start. We used  
3 fast in-vivo two-photon calcium imaging to reconstruct, at cellular resolution, the dynamics of  
4 focal cortical seizures as they emerge in epileptic foci (intrafocal), and subsequently propagate  
5 (extrafocal). We find that seizures start as intrafocal coactivation of small numbers of neurons  
6 (ensembles), which are electrographically silent. These silent “microseizures” expand saltatorily  
7 until they break into neighboring cortex, where they progress smoothly and first become  
8 detectable by LFP. Surprisingly, we find spatially heterogeneous calcium dynamics of local PV  
9 interneuron sub-populations, which rules out a simple role of inhibitory neurons during seizures.  
10 We propose a two-step model for the circuit mechanisms of focal seizures, where neuronal  
11 ensembles first generate a silent microseizure, followed by widespread neural activation in a  
12 travelling wave, which is then detected electrophysiologically.

## 13 Introduction

14 Understanding the properties of seizure-producing cortical circuits (“ictal networks”) may enable  
15 more efficient seizure control. Epileptic discharges are thought to emerge at locally confined  
16 epileptic foci, from where they can secondarily spread across the brain. Although there have  
17 been several studies detailing how epileptic seizures invade and spread through neighboring  
18 cortical territories (Badea et al., 2001; Cammarota et al., 2013; Feldt Muldoon et al., 2013; Lillis  
19 et al., 2015; Muldoon et al., 2015; Neubauer et al., 2014; Tashiro et al., 2002; Trevelyan et al.,  
20 2007; Wenzel et al., 2017), it remains unclear how seizures actually start *in vivo*. Further,  
21 because cortical circuits are complex in terms of cell types and connectivity, it is likely that the  
22 contribution of individual cell types to seizure progression could differ depending on their  
23 location. Yet to date, little is known about the local neural sub-population dynamics within ictal

24 networks (Muldoon et al., 2015; Neumann et al., 2017). However, an understanding of how  
25 exactly seizures progress from micro- to macroscale in the intact brain may hold critical new  
26 clues on how to stop their expansion.

27 Due mostly to technical limitations, our knowledge about the precise dynamics of local brain  
28 networks in and outside such foci is still scarce. Recent technologies have enabled more fine-  
29 scaled studies of these dynamics leading for example to the identification of micro-epileptic  
30 discharges (“microseizures”) (Goldensohn, 1975; Schevon et al., 2008; Stead et al., 2010;  
31 Worrell et al., 2008), which are clinically silent and too small and confined to be detectable by  
32 conventional electrodes (Stead et al., 2010). Thus, a better understanding of seizure emergence  
33 and spread at a neural circuit level requires techniques with high spatiotemporal resolution.  
34 While multi-electrode arrays have pushed our understanding of fine-scale epileptic network  
35 dynamics, the most common arrays (96 electrodes, 4x4mm) do not allow measurements of  
36 complete neural circuits. In fact, such arrays usually record from several dozen (at best up to  
37 ~180) neurons from patches of cortex or hippocampus (Neumann et al., 2017; Truccolo et al.,  
38 2011), which, however, contain hundreds of thousands of neurons. Due to this, and the usually  
39 spatially poor identification of seizure initiation sites prior to electrode implantation in patients or  
40 animals, it has remained unproven if micro-seizures are mandatory pre-cursors of pending  
41 macro-seizures, or how they transition from focal discharges to generalized ictal events. As an  
42 alternative to electrophysiology, calcium imaging can monitor action potential activity with single  
43 cell resolution (Smetters et al., 1999; Yuste and Katz, 1991), so it seems as an ideal method to  
44 map microseizures and ictal spread, cell by cell (Badea et al., 2001). However, calcium imaging  
45 studies of epileptiform activity have traditionally suffered from a temporal resolution too low to  
46 investigate sizable population dynamics during seizures (Badea et al., 2001; Cammarota et al.,  
47 2013; Feldt Muldoon et al., 2013; Lillis et al., 2015; Muldoon et al., 2015; Neubauer et al., 2014;  
48 Tashiro et al., 2002; Trevelyan et al., 2007). To improve the temporal resolution of calcium

49 imaging, we recently introduced a fast (30Hz) resonant scanning resonant scanning method to  
50 study cortical seizure propagation *in vivo* (Wenzel et al., 2017). In that initial study, general local  
51 network recruitment patterns to spreading ictal activity were investigated at a distance to the  
52 seizure initiation site. We found that in the propagation area, seizure spread occurs smoothly,  
53 through stereotypical circuits, and that this spread is elastic in time and regulated by the activity  
54 of GABAergic interneurons.

55 Here we turn our attention to the initiation site of cortical seizures ('epileptic focus' or 'intrafocal  
56 region'), and compare the findings to recruitment patterns within the propagation area ('surround  
57 cortex' or 'extrafocal region'). To compare seizure progression in both these compartments, we  
58 use fast (30Hz) two-photon calcium imaging of GCaMP-labeled neuronal populations of mouse  
59 somatosensory cortex and LFP recordings in the 4-Aminopyridine (4-AP) mouse model of local  
60 onset seizures *in vivo*. The approach combines high temporal and single cell resolution to unveil  
61 the local population activity underlying seizures with unequivocal anatomical precision. With a  
62 precisely defined seizure onset zone by local cortical 4-AP injection, we image cortical circuits  
63 within the seizure initiation site as well as the propagation area that is invaded only during ictal  
64 spread. Further, we perform sub-population calcium imaging of td-Tomato labeled GABAergic  
65 interneurons (parvalbumin-positive or PV neurons) within those territories during seizure  
66 emergence and spread, and find spatially heterogeneous PV recruitment, in contrast to simple  
67 models of how GABAergic interneurons are recruited during epilepsy. Our data represent a  
68 complete reconstruction of seizures progression from their microepileptic origins, have potential  
69 implications for the early detection of pending seizures, and provide novel insights into the  
70 recruitment dynamics of neuronal sub-populations in neocortical focal onset seizures.

## 71 **Results**

72 We used an *in vivo* mouse model of acute cortical seizures applying local injection of 4-AP  
73 (15mM, 500nl, layer 4 or 5, total amount delivered = 7,5nmol) in lightly anesthetized mice (n=13

74 animals). In six mice we characterized the intra- or extrafocal recruitment to epileptic activity  
75 (898 neurons), while seven animals were used for imaging of neuronal sub-populations (1059  
76 neurons, of which 79 were PVs). We carried out experiments under light anesthesia to reduce  
77 the animal burden of a series of prolonged tonic-clonic seizures. Despite differences such as  
78 seizure threshold or propagation speed, general neural recruitment patterns during cortical  
79 seizure progression share fundamental characteristics across anesthesia and wakefulness (Uva  
80 et al., 2013; Wenzel et al., 2017). Indeed, seizures in humans do not only happen during  
81 wakefulness but are encountered in seizure-susceptible individuals even during deeper  
82 anesthesia on the intensive care unit or in the operation room (Howe et al., 2016; Ulkatan et al.,  
83 2017). The 4-AP model was chosen for several reasons (see also Methods). First, local injection  
84 of 4-AP establishes a territorially well-defined acute epileptic focus surrounded by otherwise  
85 unperturbed cortex that is invaded during seizure spread. This acute situation actually  
86 resembles real world medical conditions such as intracerebral bleeding, local brain trauma or  
87 ischemic stroke, in which acute seizures often occur shortly after the injury (Beleza, 2012). The  
88 model also shares similarities with chronic conditions such as epilepsy with focal onset seizures,  
89 where spatially confined epileptic discharges secondarily spread into otherwise functionally  
90 intact brain tissue (Milton et al., 2007). Moreover, unlike disinhibitory chemoconvulsants like  
91 picrotoxin or bicuculline, 4-AP leaves inhibitory circuits intact, and elicits electrographic and  
92 behavioral phenomena that are similar to seizures in chronic epilepsy (Avoli et al., 2002; Szente  
93 and Pongracz, 1979). Instead of addressing a specific disease pathway but rather considering  
94 epileptic seizures as a phenomenon shared by many neurological disorders and even the  
95 healthy brain, our model focused on understanding the phenomena of epileptic states (Jirsa et  
96 al., 2014).

97

98 **Two-photon calcium imaging of ictal foci *in vivo***

99 Two experimental setups were employed: either a craniotomy for imaging within the propagation  
100 area or a craniotomy combined with adjacently thinned skull for intra-focal imaging (Fig. 1 A). In  
101 both setups, imaging was carried out in layers 2/3 (L2/3, ~150  $\mu\text{m}$  beneath the cortical surface)  
102 of mouse primary somatosensory cortex. The experimental workflow is depicted in Figure 1 B.  
103 For LFP measurements, which served as a gross indicator and additional confirmation of  
104 epileptic activity within the investigated cortical territory, a sharp glass microelectrode was  
105 carefully lowered into the cortex close by the imaged area. For induction of ictal events, a  
106 second glass micropipette containing 4-AP (total amount delivered = 7,5nmol) was slowly  
107 advanced to a cortical depth of ~480  $\mu\text{m}$ . The tip of the 4-AP pipette was either positioned at a  
108 distance of ~1,5-2 mm caudally to the field of view (propagation area) or directly underneath the  
109 imaged area (initiation site). During baseline conditions, local populations in L2/3 in the epileptic  
110 focus displayed ongoing sparse and distributed calcium activity (Fig. 1 C left, 1 D left; (Miller et  
111 al., 2014)), contrasted by sustained firing of larger numbers of neurons in the field of view during  
112 seizure occurrence post 4-AP injection (Fig. 1 C right, 1 D right). Within the surrounding cortex,  
113 ictal invasion happened in a wave of burst neuronal firing continuously advancing across the  
114 field of view (suppl. movie 1). The temporal imaging resolution of 30Hz was sufficient to capture  
115 individual cell recruitment to ictal activity (Fig. 1 E). To better understand this recruitment, we  
116 focused on the immediate pre-ictal and early intra-ictal cell recruitment (time window 45  
117 seconds prior to and 10 seconds into individual seizures), since this window represents a critical  
118 time for potential therapeutic interventions. In order to systematically investigate general  
119 temporal characteristics of seizure progression, we analyzed the activity of all neurons in the  
120 field of view that showed visible calcium transients during epileptic activity and whose somata  
121 could be followed across the entire experiment. Individual cell recruitment time-points to ictal  
122 activity were derived by calculating the first discrete derivative (slope) of the fluorescent traces

123 assuming that the steepest rise in fluorescence correlates best with maximal recruitment to  
124 seizure activity (Badea et al., 2001; Trevelyan et al., 2006; Wenzel et al., 2017).

125

### 126 **Seizure initiation and propagation areas display differential spatiotemporal activity**

127 In the propagation area, electrographic seizures and calcium transients corresponded well and  
128 neurons in the propagation area were recruited in a continuous fashion (Fig. 2 A, Fig. 2 B top)  
129 (Wenzel et al., 2017). But, prior to ictal invasion during electrographic seizure onset, little to no  
130 calcium activity was visible in surround cortex. To analyze this, we superimposed the calcium  
131 activity for all experiments in the propagation area around the frame where the proportion of  
132 active neurons reached 50%. The superimposed graphs lined up consistently, describing a  
133 continuous s-shaped curve (Fig. 2 B bottom,  $n = 3$  experiments; GCaMP6s; total # of seizures =  
134 31; average # of seizures =  $10,3 \pm 1,5275$ ; total # of analyzed cells = 576; average # of  
135 analyzed cells =  $192 \pm 58,9237$ ), as previously described (Neumann et al., 2017; Wenzel et al.,  
136 2017).

137 The seizure initiation site, however, displayed strikingly different activity patterns (Figure 2 C).  
138 Unlike the surrounding cortex, we observed locally restricted, pronounced pre-ictal bursts of  
139 calcium activity, sometimes long before electrographic seizure onset (Fig. 2 C, suppl. movie 2).  
140 These neuronal coactivations (or ensembles) are consistent with previous observations of  
141 "microseizures " that can precede macro-electrographic seizures by seconds to minutes  
142 (Goldensohn, 1975; Schevon et al., 2008; Stead et al., 2010), or even weeks to months during  
143 epileptogenesis (Bragin et al., 2000). Consequently, the terms "ictal" and "pre-ictal" become  
144 somewhat blurred so we refer to the seizure onset as the electrographic (LFP) seizure onset.  
145 Moreover, neurons within the epileptic focus were recruited in a stepwise pattern (Fig. 2 D top).  
146 Indeed, when we superimposed all imaged intrafocal neuronal activity around the 50%

147 recruitment frame, a heterogeneous pattern emerged from highly variable individual recruitment  
148 graphs (Fig. 2 D bottom,  $n = 3$  experiments, GCaMP6s, total # of seizures = 39, average # of  
149 seizures  $13 \pm 1,55$ , total # of analyzed cells = 272, average # of analyzed cells =  $92 \pm 23$  cells).  
150 Neuronal recruitment was temporally stretched, up to dozens of seconds ahead of the  
151 electrographic seizure onset (Figure 2 E), much beyond the already considerable variability of  
152 neuronal activation across seizures within the surround cortex (Wenzel et al., 2017) (Figure 2  
153 F).

154 We compared the spatiotemporal maps of successive seizures between the propagation area  
155 and the seizure initiation site and found that both territories followed differential trajectories  
156 during ictal progression. Within the propagation area, ictal expansion followed a linear path  
157 (Figure, 2 G and H, suppl. movie 1), whereas in the initiation site, it was multi-directional (Fig. 2  
158 G and I, suppl. movie 2). However, despite the differential trajectories, a conserved spatial  
159 pattern of relative cell recruitment was evident in both compartments across seizures (Figure 2  
160 H and I, suppl. Fig. 1 A and B) (Neumann et al., 2017; Trevelyan et al., 2006; Truccolo et al.,  
161 2014; Wenzel et al., 2017). To quantify and compare these observed spatiotemporal patterns,  
162 we used a 2-dimensional ANOVA (Wenzel et al., 2017), categorizing cells into temporal  
163 quartiles and comparing i) the variance of the distance of each cell to the quartile spatial mean  
164 to ii) the variance of the distance to the spatial mean of all cells (Suppl. Fig. 1 C). The analysis  
165 yielded significant differences between distributions, with bivariate F-values for all experiments  
166 in the propagation area ( $F = 12,67, 11,64, 41,22$ ; all  $p < 0,001$ ) and in the epileptic focus ( $F =$   
167  $22,15, 4,02, 3,43$ ;  $p = 1,4 \times 10^{-9}, 0,0145, 0,024$ ) (Fig. 2 H and I).

168 Taken together, we find a saltatory, multi-directional micro-epileptic seizure expansion within the  
169 epileptic focus followed by a smooth, more linear invasion of surround cortex. Within the  
170 epileptic focus, spatially restricted synchronizations occur up to dozens of seconds prior to  
171 electrographic seizure onset, with highly variable, temporally stretched neural recruitment time



172 courses. In stark contrast, in the surround cortex, pre-ictal activity is low and ictal recruitment  
173 occurs only during full electrographic seizures. Despite differential recruitment time courses and  
174 spatiotemporal trajectories, the relative spatiotemporal activity patterns are consistent across  
175 seizures in both intrafocal and extrafocal compartments.

176

### 177 **Pre-ictal subnetwork compartmentalization and critical state transitions**

178 The differential intrafocal and surround sub-network activity before electrographic seizure onset  
179 prompted us to further investigate the mechanisms underlying these pre-ictal population  
180 dynamics. To this end, we analyzed neuronal correlations in the calcium imaging data by  
181 applying principal components analysis (PCA; materials and methods) to 40-second pre-seizure  
182 periods. PCA weights were calculated within an experiment across all seizures and applied in  
183 time to simplify the “state-space” of multidimensional population activity occurring before and  
184 during seizure onset (Fig. 3 A and B). We found a multitude of substantial pre-ictal network state  
185 trajectories (Fig. 3 A, gray scale) within the epileptic focus prior to seizure onset (green). Indeed,  
186 compared to the pre-ictal network activity in surrounding cortex (Fig. 3 B, gray scale, onset in  
187 green), which was sparse (Schevon et al., 2012) and correspondingly did not show significant  
188 excursions in state space before seizure onset, intra-focal pre-ictal dynamics showed large  
189 epileptiform trajectories in PCA state space. During the 40 seconds before seizure onset, intra-  
190 focal average population activity was persistently higher than during baseline and escalated  
191 noticeably towards seizure onset (Fig. 3 C, red trace). On the contrary, pre-ictal population  
192 activity in the surrounding territories was in fact steadily lower than during baseline conditions  
193 (Fig. 3 C, blue trace).

194 Interestingly, pre-ictal PCA trajectories were not simply lower magnitude versions of the ictal  
195 ones but occupied different portions of the multicellular state-space, suggesting that pre-ictal

196 activity within the epileptic focus may involve specific subgroups of neurons rather than lower  
197 magnitude pulsing of the whole ictal population. A similar phenomenon was recognizable in the  
198 propagation area as well (Fig. 3 B, magnified portion, suppl. Fig. 2), where, during baseline  
199 conditions, a much greater diversity of network states emerged, stretching out in multiple  
200 dimensions (Fig. 3 B, magnified portion, suppl. Fig. 2 A). Thus, the transition from a pre-ictal to  
201 an ictal state involved a reduced dimensionality in population activity (Fig. 3 E). Such a  
202 transition suggests a decline of the network into lower dimensional attractors (or semi-stable,  
203 theoretically recurrent population states), which has been proposed by computational  
204 simulations and EEG analysis (Lopes da Silva et al., 2003) to occur during ictal transition, but  
205 never directly documented at cellular resolution.

206 Together, we show that during epileptic expansion, intra- and extrafocal subnetworks of neurons  
207 activate differently. While intrafocal population activity escalates towards electrographic seizure  
208 onset, surround cortical subnetwork activity drops below baseline level. In both compartments,  
209 subnetwork activity declines into lower dimensional attractors during transition to  
210 macroseizures.

211

## 212 **Local PV interneuron populations enhance ictal network compartmentalization**

213 Recent *in vitro* and *in vivo* studies involving functional interference with interneuronal subtypes  
214 (especially fast-spiking PVs) have led to controversial results regarding the role of fast-spiking  
215 interneurons in seizure promotion or restraint (Avoli and de Curtis, 2011; Avoli et al., 1993;  
216 Cammarota et al., 2013; Gnatkovsky et al., 2008; Krook-Magnuson et al., 2013; Ledri et al.,  
217 2014; Shiri et al., 2015). With regard to interneuronal recruitment dynamics during epileptic  
218 activity, a recent study showed reliable recruitment of putative fast-spiking interneurons to  
219 epileptic activity (Neumann et al., 2017) echoing the finding of reliable ictal recruitment reliability

220 at the general population level (Truccolo et al., 2011; Wenzel et al., 2017). In line with Muldoon  
221 and colleagues (Muldoon et al., 2015), Neumann et al. also found that epileptic activity  
222 predominantly entrained PVs, not pyramidal cells. However, it remains unclear, whether these  
223 studies recorded inside the seizure initiation site, or surround cortex.

224 To understand the role of local GABAergic interneuron populations during seizure formation and  
225 spread, we studied calcium dynamics of PV neurons in both intrafocal and extrafocal  
226 compartments by using transgenic mice that express the red fluorescent protein td-Tomato in  
227 parvalbumin containing interneurons (Madisen et al., 2010). First, we simultaneously imaged PV  
228 and non-PV calcium dynamics during seizure spread into the propagation area (Extrafocal,  
229 Figure 4 A, suppl. movie 3). Interestingly, PVs were consistently among the neurons displaying  
230 the strongest calcium activity during the pre-ictal period (Fig. 4 B). Population level analyses  
231 further supported this finding. While absolute activity (e.g. firing rates) could not be directly  
232 compared between PV cells and non-PV cells given known differences in cell calcium dynamics,  
233 bursting patterns, and baseline rates (Hofer et al., 2011), the relative ratio of PV versus non-PV  
234 population calcium transients was inverted in the pre-ictal period compared to baseline  
235 conditions (Fig. 4 C), suggesting that PVs comprise a functionally distinct sub-population in the  
236 propagation area during seizure formation (Liou, 2018; Neumann et al., 2017). During the initial  
237 phase of electrographic seizures, we encountered surprisingly eclectic PV population dynamics  
238 with several striking features. In accordance with previous reports, we identified PVs that  
239 reliably showed strong calcium transients just ahead of the arriving ictal wavefront (Fig. 4 D cell  
240 1 and 3) (Cammarota et al., 2013; Kawaguchi, 2001; Schevon et al., 2012; Timofeev et al.,  
241 2002; Trevelyan et al., 2006; Ziburkus et al., 2006). At the same time however, we found at  
242 times immediately neighboring PVs displaying delayed recruitment (Cell 2 and 5 in Fig. 4 D and  
243 E). In line with the electrophysiological data by Neumann and colleagues (Neumann et al.,  
244 2017), these sequential PV calcium dynamics were conserved across seizures (Fig. 4 E).

245 Surprisingly, we also identified transiently non-participant PVs (Cell 4 in Fig. 4 D upper panel,  
246 Fig. 4 E, suppl. movie 3.1). Clear recruitment to later events (Cell 4 in Fig. 4 D, lower panel,  
247 Figure 4 E, suppl. movie 3.2) excluded the possibility of a lack of GCaMP expression.

248 Finally, we went on to image sub-population dynamics within the epileptic focus (Fig. 5 A, suppl.  
249 movie 4). Consistent with our results in the propagation area, PVs showed less population  
250 average calcium activity than non-PVs at baseline (Fig. 5 B left). Yet, by contrast, after 4-AP  
251 injection, this relationship was not inverted in the 40 seconds before seizure onset (Fig. 5 B  
252 right). We also did not encounter an increased percentage of intrafocal PVs among the neurons  
253 displaying highest calcium activity during the pre-ictal period. This does not indicate that intra-  
254 focal PVs were less active but, rather, that they were confronted with enhanced local firing of  
255 non-PV cells (Fig. 5 C). Like in the propagation area, we found diverse local recruitment of PVs  
256 to ictal activity (Fig. 5 D, arrowheads). During intra-focal micro-epileptic progression, we  
257 observed stepwise failure of the inhibitory surround (Cammarota et al., 2013; Trevelyan et al.,  
258 2006) (Figure 5 A and D, Fig. 5 D, blue bars, suppl. movie 4.1 and 4.2).

259 We conclude that PVs have heterogeneous spatiotemporal patterns of activity within epileptic  
260 networks. Before electrographic seizure onset, a hypoactive surround cortex, and even small  
261 hypoactive regions ( $<100\mu\text{m}^2$ ) within the seizure initiation site, are observed together with  
262 increased local PV population activity. On a population level, PVs increase their firing ahead of  
263 the ictal wave front during ictal spread, in line with previous studies (Cammarota et al., 2013;  
264 Gnatkovsky et al., 2008; Prince and Wilder, 1967; Schwartz and Bonhoeffer, 2001; Timofeev et  
265 al., 2002). However, at the single cell level, we find side-by-side early and late PV recruitment in  
266 a spatially heterogeneous fashion, and even non-participant PVs. The temporal patterns of  
267 sequential PV activation repeat across ictal events (Neumann et al., 2017).

268

269 **Discussion**

270 To investigate how epileptic seizures start within epileptic foci, we used an *in vivo* mouse model  
271 of acute pharmacological seizures induced by local cortical 4-AP injection (Liou, 2018; Ma et al.,  
272 2013; Wenzel et al., 2017; Zhao et al., 2011), a widely established model of partial onset  
273 neocortical seizures that enables the establishment of a territorially restricted epileptic focus  
274 whose location is precisely defined. We used fast calcium imaging to study cortical circuit  
275 activity within the epileptic focus and in primarily unperturbed surround cortex during secondary  
276 seizure spread.

277 We find intra-focal synchronization of neuronal populations that occurs *before* electrographic  
278 seizure detection (Figure 2). These coactive neuronal ensembles likely correspond to the  
279 microseizures described in human recordings (Goldensohn, 1975; Schevon et al., 2008; Stead  
280 et al., 2010; Worrell et al., 2008). Studies using multi-electrode arrays (MEA) have suggested  
281 that sustained micro-epileptic activity may represent the earliest step during seizure emergence  
282 (Bragin et al., 2000; Goldensohn, 1975; Schevon et al., 2008; Stead et al., 2010; Worrell et al.,  
283 2008). However, it has been difficult to definitely prove this hypothesis using MEAs, due to their  
284 sparse sampling of cortical circuits. Indeed, common MEAs used in humans cover a cortical  
285 area of 4x4 mm and contain 96 electrodes spaced 400  $\mu\text{m}$  apart. Since the seizure initiation site  
286 can be as small as 0.04  $\text{mm}^3$  and the exact locus of the seizure onset zone is usually poorly  
287 mapped in human patients or animal models of chronic epilepsy, full temporal seizure evolution  
288 is likely missed (Schevon et al., 2008). Our experiments, using an imaging method where we  
289 can monitor the activity of every neuron in the field of view, are consistent with the hypothesis  
290 that microepileptic activity is a prerequisite of seizures, as in our data ictal events were always  
291 reliably preceded by pre-ictal micro-epileptic build-up within the epileptic focus.

292 Our imaging approach further enabled us to map seizure progression from its earliest time point  
293 in the intact brain. We observed differential modes of spatiotemporal intrafocal progression

294 during microseizures in comparison to ictal invasion of neighboring cortex during electrographic  
295 seizures. Inside the epileptic focus, we find a saltatory (i.e. “stepwise”, “modular” or  
296 “discontinuous”) expansion of ictal activity. These saltatory patterns are different to those  
297 observed in brain slices when applying disinhibitory drugs such as picrotoxin or bicuculline  
298 (Adams et al., 2015; Wadman and Gutnick, 1993). While there, “saltatory” propagation was  
299 observed on a millisecond range, our results show progression on a time scale of seconds,  
300 consistent with previous *in vitro* work where inhibitory circuits were kept intact (Trevelyan et al.,  
301 2006). This saltatory intrafocal activity during microseizures was followed by a more continuous  
302 seizure spread into nearby cortex during electrographic seizures, which suggests that seizure  
303 evolution consists of different consecutive steps of progression across anatomical scales  
304 (Figure 6, schematic overview). Smooth spread of ictal activity into nearby cortex surrounding  
305 an epileptic focus has been described at the macroscale (Ma et al., 2013; Schwartz and  
306 Bonhoeffer, 2001). Studies in human epilepsy patients using MEAs that were situated close, but  
307 not precisely inside the epileptic focus reported a continuous ictal progression as well (Schevon  
308 et al., 2012). Our results unify the different reported modes of ictal progression into one larger  
309 framework, and underscore that the precise location of recording is critical to any one  
310 experiment investigating progression of epileptic activity *in vivo*, not the least due to the  
311 pronounced spatial undersampling of current high resolution recording techniques such as  
312 MEAs or two-photon calcium imaging. Observed modes of progression likely depend on the  
313 experimental approach, investigated anatomical scale, recording location, recording modality  
314 and spatiotemporal resolution.

315

316 Even though abnormal interaction of excitatory and inhibitory neurons within epileptic networks  
317 has been shown to play a pivotal role in the progression of epileptiform activity (reviewed in  
318 (Trevelyan and Schevon, 2013)), little is known about their fine scale *in vivo* sub-population  
319 dynamics within ictal foci. Our data indicates that the stepwise intrafocal progression could be

320 related to a failure of local PV populations. During microseizures, at times dozens of seconds  
321 before the electrographic seizure onset in our experimental setup, the epileptic focus could be  
322 divided into small micropatches that became successively, and abruptly, invaded over the  
323 course of numerous pre-ictal barrages. Intriguingly, the yet to be invaded patches had highly  
324 active PV cells, with little activity of immediately surrounding non-PVs until ictal break-in. This  
325 fits well with previous *in vitro* studies that suggested that interneuronal depolarization block  
326 (Sessolo et al., 2015; Ziburkus et al., 2006), or a depletion of releasable GABA, cause inhibitory  
327 failure during ictal events. Notably, it never occurred in our experiments that all PVs in the field  
328 of view (~400x400  $\mu\text{m}$ ) showed simultaneous pre-ictal calcium transients. Yet, based on  
329 optogenetic activation paradigms that included the simultaneous activation of PVs in large areas  
330 or even entire brain slices (Shiri et al., 2015), recent *in vitro* studies suggested that PVs actively  
331 entrain ictal network synchronization. Our results indicate that this elicitation of ictal discharges  
332 might not reflect the *in vivo* situation. However, sustained interneuronal activity may support  
333 network synchronization by rebound excitation upon inhibitory failure (Grenier et al., 1998;  
334 Sessolo et al., 2015).

335

336 How could the propagation area experience a different kind of ictal invasion, as compared to the  
337 epileptic focus? The reason for consecutive steps of seizure progression could lie in differential  
338 pre-ictal sub-network dynamics within intra- and extrafocal cortical compartments. We show  
339 that, while the seizure initiation site is experiencing a buildup of activity with locally restrained  
340 population bursts, the activity in the surround cortex drops below baseline levels, with  
341 simultaneously enhanced calcium dynamics of local PV populations. This is in line with previous  
342 literature that suggests that feedforward inhibition, driven by the ictal core via short- and long-  
343 range axonal projections, could place areas ahead of the ictal wavefront into an “ictal penumbra  
344 state” (Schevon et al., 2012; Trevelyan et al., 2007). This penumbra state seems to be present  
345 even at large distances to the focus during ongoing local seizure activity (Liou, 2018). Based on

346 this, our result of enhanced PV population activity in cortex nearby the epileptic focus could  
347 account for the ictal progression we observe. The level of inhibition needed to restrain  
348 pathologically high levels of excitatory synaptic inputs into surround cortex prior to seizure  
349 generalization is presumably lower than in the epileptic focus itself. Thus, driven by the ongoing  
350 ictal buildup within the epileptic focus, PVs in surround cortex could suppress local network  
351 activity (which is what we observe in the propagation area), but thereby also slowly start an  
352 eventually detrimental process that has taken place already within the epileptic focus before  
353 seizure spread. This process could be driven by compartmentalized (e.g. epileptic focus versus  
354 surround cortex) extracellular and intracellular ionic disturbances such as intra-neuronal chloride  
355 accumulation (Alfonsa et al., 2015; Huberfeld et al., 2007; Pallud et al., 2014). A slow shift in the  
356 GABAergic reversal potential in surround cortex during ongoing activity build-up in the seizure  
357 initiation site could lead to a more rapid nearby surround cortex recruitment during seizure  
358 generalization, resulting in the observed, smoother ictal expansion. Of note, despite pre-ictal  
359 network compartmentalization (Prince and Wilder, 1967; Schevon et al., 2012; Schwartz and  
360 Bonhoeffer, 2001), both compartments, the seizure initiation site and the propagation area,  
361 share a dimensionality reduction of possible network states starting from early on during  
362 ictogenesis. In line with Liou and colleagues (Liou, 2018), our sub-population experiments  
363 indicate that this decline into lower dimensional attractors could be related to enhanced levels of  
364 widespread inhibition, which in turn might carry implications for the early detectionability of  
365 pending macroseizures in humans. The identification of such attractor changes would not  
366 require high spatial resolution recordings and could open up an extended pre-ictal time window  
367 for therapeutic intervention.

368

369 Finally, we find that the recruitment dynamics of local PV populations to seizure break-ins are  
370 spatially diverse, beyond the model of previous studies showing that interneurons fire ahead of  
371 the propagating ictal wave front (Camarota et al., 2013; Kawaguchi, 2001; Schevon et al.,



372 2012; Timofeev et al., 2002; Trevelyan et al., 2006; Ziburkus et al., 2006). We find a range of  
373 immediate to delayed full recruitment of local PV populations to cortical seizures, and that the  
374 temporal pattern of PV recruitment is conserved across ictal events. This is in line with  
375 Neumann and colleagues who performed tetrode recordings in chronically epileptic rats, and  
376 showed that putative fast-spiking interneurons were recruited to seizure activity in sequences  
377 preserved across ictal events (Neumann et al., 2017). This result is also complementary to our  
378 and other research groups' recent analyses of local ictal network recruitment patterns (Rossi et  
379 al., 2017; Truccolo et al., 2014; Wenzel et al., 2017). Intriguingly, we also found non-participant  
380 PVs during full ictal events, which would be impossible to uncover using micro-electrode arrays,  
381 as silent neurons remain invisible to extracellular electrode recording techniques. Since PVs can  
382 synapse onto each other and are also targets of other interneuronal classes (Bezaire and  
383 Soltesz, 2013; Pfeffer et al., 2013; Pi et al., 2013; Sik et al., 1995), non-participant PVs, and  
384 potentially other inhibitory subtypes as well, may be actively inhibited during ictal activity (Paz  
385 and Huguenard, 2015). This finding might also help understand why in vivo optogenetic  
386 activation of PVs during seizures still suspended epileptic activity (Krook-Magnuson et al.,  
387 2013), in a circumstance where one would have assumed PVs to be strongly active anyway. In  
388 those experiments, light activation might have recruited predominantly "non-exhausted" PVs.  
389 What was surprising to us was that while temporal sequences of PV interneuron recruitment  
390 were reliable across seizures, their spatial recruitment on a single cell level was much more  
391 heterogeneous than previously thought. At times, immediately neighboring PVs (inter-cell  
392 distance < 20  $\mu$ m) showed completely different temporal activation. This uncovers that below  
393 population level analysis (which relates to the average behavior of a group of cells), the PV sub-  
394 family does not activate homogeneously ahead of the traveling ictal wavefront. Instead, local  
395 ictal PV activity patterns are spatially diverse, potentially due to differential PV subtype  
396 connectivity patterns within this sub-family.

397

398 In summary, we provide novel insights into the microcircuit dynamics during across seizure  
399 evolution from its earliest time point in vivo. Our experiments help unify previously contrasting  
400 results on modes of ictal progression and show that ictal PV population dynamics in both  
401 surround and intrafocal regions are more diverse than previously thought. Future work on  
402 inhibitory, and dis-inhibitory activity at the microcircuit level within precisely defined locations  
403 across the epileptic network will aid in the development of more targeted and efficient future  
404 therapeutic routes.

405

406 **Acknowledgments:** We thank Dr. Yeonsook Shin, Alexa Semonche, Reka Recinos, Mari  
407 Bando and Azadeh Hamzei for viral injections. Additionally, we are grateful to other members of  
408 the Yuste Lab for useful comments. This work was supported by the Deutsche  
409 Forschungsgemeinschaft (DFG, grant WE 5517/1-1), NEI (DP1EY024503, R01EY011787),  
410 NIMH (R01MH101218, R01 MH100561) and DARPA SIMPLEX N66001-15-C-4032. This  
411 material is based upon work supported by, or in part by, the U. S. Army Research Laboratory  
412 and the U. S. Army Research Office under contract number W911NF-12-1-0594 (MURI). The  
413 authors have no competing financial interests to declare. M.W. and R.Y. conceived the project.  
414 M.W. performed all experiments and wrote the paper. M.W. and J.P.H. analyzed the data. All  
415 authors planned experiments, discussed results and edited the paper. R.Y. assembled and  
416 directed the team and secured funding and resources.

417

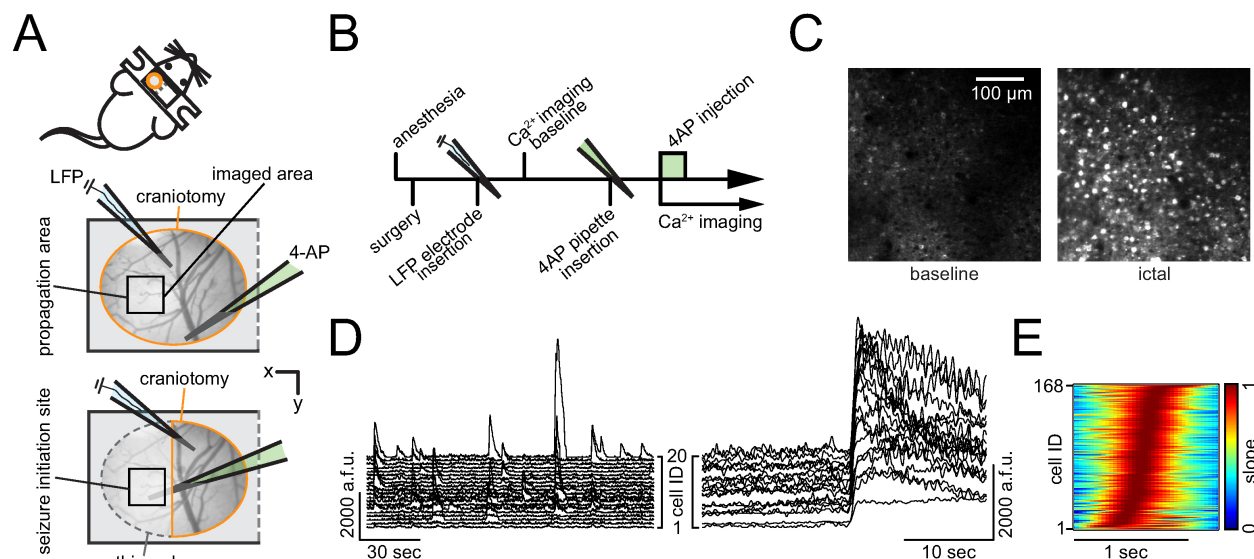

418  
419  
420

### Figure 1: Imaging seizures in initiation and propagation area

421 (A) Experimental setup. Two surgical approaches over left somatosensory cortex; craniotomy  
422 encircled in orange, thinned skull in dotted gray, black squares indicate imaging field of view  
423 (FOV); each experiment (exp.) involved the insertion of two glass micropipettes, one (blue)  
424 containing a silver chloride silver for LFP (local field potential) recording, the other (green)  
425 containing 4-AP (4-Aminopyridine, 15mM, injection vol. 500 nl, total amount delivered =  
426 7,5nmol). (B) Experimental workflow. (C) Propagation area, representative 3 second average  
427 fluorescence images of neural activity (GCaMP6s) during baseline and ictal event. (D) Calcium  
428 transients of 20 representative cells during baseline conditions (left) and during seizure onset  
429 period (right). a.f.u. = arbitrary fluorescent units (E) Propagation area, representative example of  
430 the arriving ictal wavefront. Normalized first derivative of each registered neuron's fluorescent  
431 trace during electrographic seizure onset. Cell recruitment to ictal activity ordered in time by  
432 maximum slope. Note the s-curved shape of cell recruitment highlighting sufficient temporal  
433 imaging resolution for individual cellular recruitment.

434  
435  
436

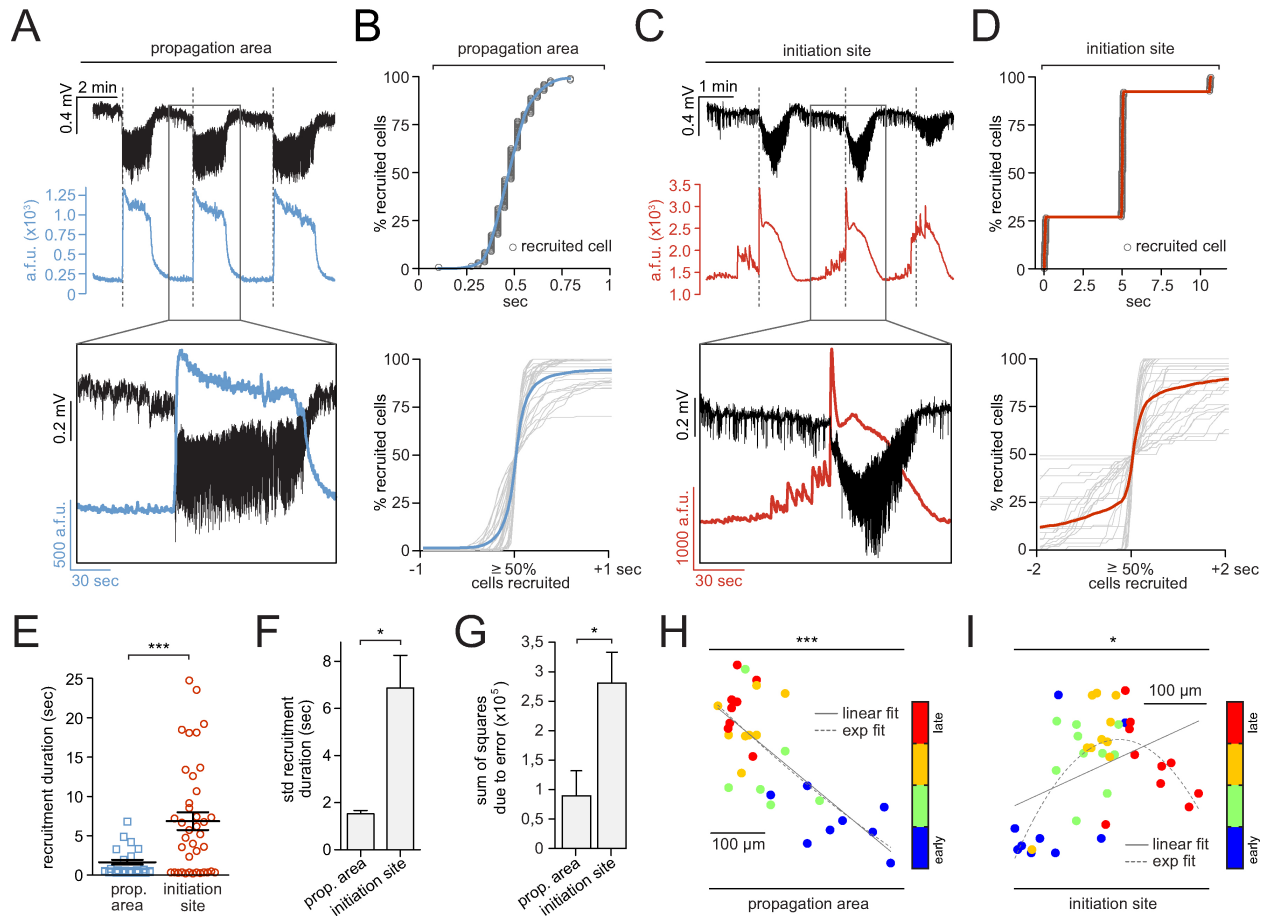

437

438

439 **Figure 2: Differential intrafocal and extrafocal neuronal recruitment during epileptic**  
 440 **activity**

441 **(A)** Propagation area: LFP recording (black) and corresponding population average calcium

442 transient (blue) of 3 consecutive seizures, detailed depiction of 2nd event (inset, suppl. movie

443 1). Note how electrographic seizure onsets (dotted lines) correspond to sudden rise of the

444 population calcium signal. a.f.u. = arbitrary fluorescent units **(B)** Top: Representative example of

445 smooth, s-shaped cell recruitment during an individual seizure onset. Bottom: Superposition of

446 neural recruitment curves across all analyzed seizure onsets (gray) centered around the 50%

447 recruitment frame; blue graph represents mean ( $n = 3$  exp., total # of seizures = 31 [ $10,3 \pm 0,88$

448 s.e.m.], total # of cells analyzed = 626 [ $209 \pm 44$  s.e.m.], cell number in % for comparability

449 across exp.). **(C)** Initiation site: LFP recording (black) and corresponding average population

450 calcium transient (red) of 3 consecutive seizures, detailed depiction of 2nd event (inset, suppl.

451 movie 2). Note temporal mismatch of electrographic seizure onsets and intrafocal population  
452 calcium events. Large pre-ictal population bursts are visible prior to the electrographic seizure  
453 onset (dotted line). **(D)** Top: Representative example of step-wise cell recruitment during intra-  
454 focal ictal progression. Bottom: Superposition of all analyzed intra-focal microseizures (gray)  
455 centered around the 50 % cell recruitment frame; red graph represents mean (3 exp., total # of  
456 seizures = 39 [ $13 \pm 1,55$  s.e.m.]). **(E)** Comparison of extra- and intra-focal cell recruitment  
457 durations (n = 31 and 39 durations; mean  $1,83 \pm 0,3$  sec and  $6,82 \pm 1,1$  sec, Mann Whitney test  
458  $p < 0,001$ ). Determination of recruitment durations by calculating the time period from the first to  
459 the last recruited registered cell, excluding the 5% most deviant cells. **(F)** Comparison of  
460 extrafocal vs. intrafocal recruitment duration variability (mean std  $\pm$  s.e.m., Mann Whitney test  
461  $p < 0,05$ ). **(G)** Comparison of extrafocal vs. intrafocal seizure trajectories. Displayed sum of  
462 squares due to error based on a goodness of fit to a linear spatiotemporal ictal expansion. **(H)**  
463 Spatial analysis of propagation area: Spatiotemporal quartile clustering (quartiles calculated as  
464 mean coordinate of 1-25% earliest cells, 25-50%, 50-75% and 75-100%, see materials and  
465 methods) across 10 consecutive seizures (bivariate ANOVA  $p < 0,001$ , all extrafocal exp.  
466  $p < 0,05$ ). **(I)** Spatial analysis of initiation site: Spatiotemporal quartile clustering (each quartile  
467 coordinate = spatial mean of 25% recruited cells) clustering across 10 consecutive seizures  
468 (bivariate ANOVA  $p = 0,0145$ , all intrafocal exp.  $p < 0,05$ ). Note how ictal progression in the  
469 propagation area and seizure initiation site visibly follow differential spatiotemporal trajectories  
470 (linear and exponential trajectory fit indicated by continuous and dotted lines).

471

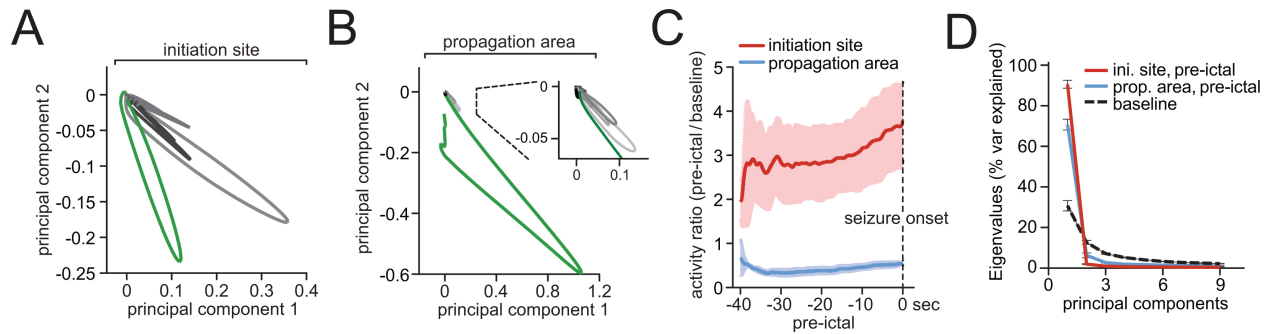

472

473 **Figure 3: Differential dynamical trajectories in intrafocal and extrafocal areas**

474 (A) Representative network state spaces (40 second pre-ictal state changes in gray-scale [black

475 = earliest change], electrographic seizure onset in green) within epileptic focus and (B)

476 propagation area, with a magnified inset. (C) Cumulative frame-population-averaged positive

477 change of fluorescence, normalized to baseline (set to 1), as indicator of general relative

478 network activity changes over time (GCaMP6s, 3 extrafocal / 3 intrafocal experiments, 29 / 39

479 pre-ictal periods). Pre-ictal intra-focal versus penumbral network activity was compared by a

480 running t-test ( $p < 0.001$  from -34 to 0 sec). (D) Scree plot of principal components of baseline

481 network activity versus pre-ictal intrafocal and extrafocal activity. Note reduced number of

482 principal components in both pre-ictal conditions. Displayed components accounted for more

483 than 90% of the variance, respectively.

484

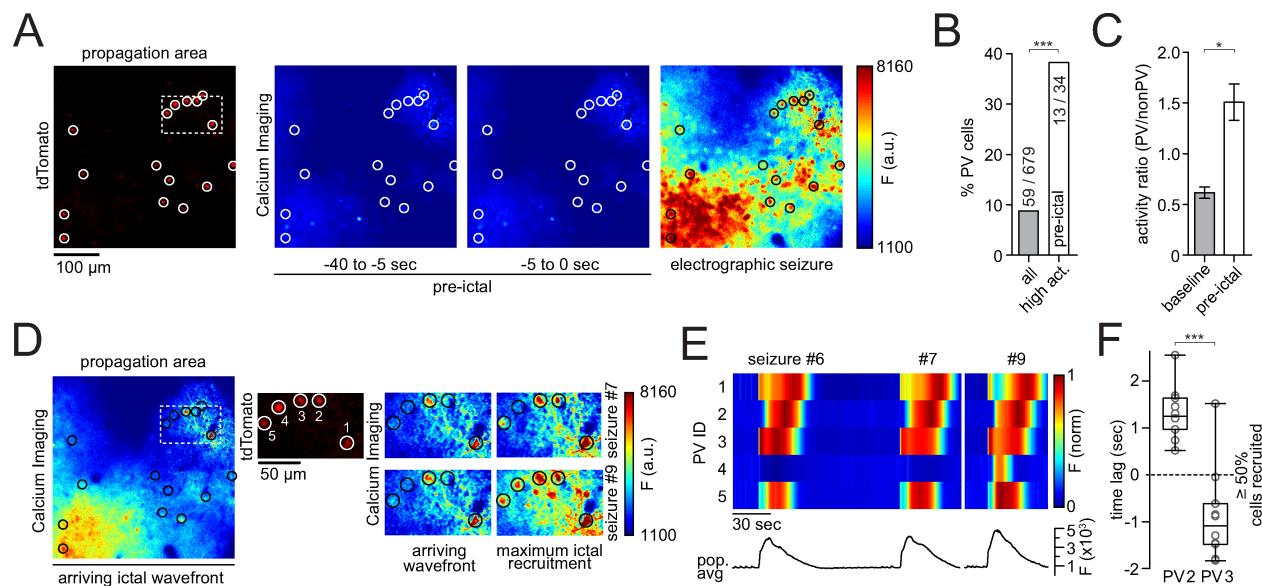

485  
486 **Figure 4: Interneuronal recruitment in the propagation area**  
487 **(A)** Left to right: tdTomato-positive parvalbumin containing interneurons (PVs, encircled),  
488 imaged at 990 nm; calcium imaging (at 940 nm): fluorescence average images during pre-ictal  
489 period and sustained ictal activity. **(B)** PV percentage among highest active neurons during pre-  
490 ictal period ( $n = 4$  experiments, total # of pre-ictal periods = 30 [ $7,5 \pm 1,85$  s.e.m.], all imaged  
491 non-PVs = 620, PVs = 59, top 5% activity cells = 34) as compared to general subtype  
492 distribution (Chi Square test  $P(\chi^2 > 39,381) < 0,001$ ). **(C)** Activity ratio of PV versus non-PV sub-  
493 populations during baseline and the 40-second period before seizure onset. Activity ratios were  
494 obtained by dividing frame-sub-population-averaged positive change of calcium fluorescence.  
495 During baseline (left), PVs continually display lower values than non-PVs. During the pre-ictal  
496 period (right), this relationship is inverted ( $n = 4$  experiments, GCaMP6s, 30 pre-ictal periods,  
497 Mann Whitney test  $p=0,0286$ ). **(D)** Same experiment as in A, during break-in of ictal wave front  
498 (left); middle and right side: insert shown in A and D (dotted box). Displayed are 5 immediately  
499 neighboring PVs and their calcium transients during ictal break-in and sustained ictal activity  
500 across two successive seizures (upper and lower panel, see also suppl. movie 3.1 and 3.2).  
501 Note the diverse PV recruitment to ictal activity with PV #1 and #3 bursting ahead of the arriving  
502 ictal wavefront, PV #2 and #5 showing delayed recruitment (intra-ictal section), and one non-

503 participant PV (#4) during the first seizure. The latter cell is clearly recruited to a successive ictal  
504 event. (E) Bottom: Population average calcium fluorescence signal of all 124 registered cells  
505 from exp. shown in A and D across three seizures (#6, 7, and 9). Top: Max-normalized calcium  
506 fluorescence for the 5 PVs highlighted in D, shown across three seizures. Note the differential  
507 recruitment on the order of seconds of even immediately neighboring PVs. PV #4 does only  
508 show a clear calcium signal in the last seizure displayed (F) Differential relative recruitment  
509 (Time lag with respect to the 50% recruitment frame) of immediately neighboring PV #2 and #3  
510 (inter-cell distance <50  $\mu\text{m}$ , both cells are located far from the arriving wavefront within the  
511 imaged area) across all seizures of an experiment (10 seizures, Mann Whitney test  $p < 0,001$ ).  
512 Boxes represent 25%ile to 75%ile of cellular recruitment, bands inside boxes display median  
513 cell recruitment time points, circles represent cell recruitment time lag for individual seizures.

514

515

516

517



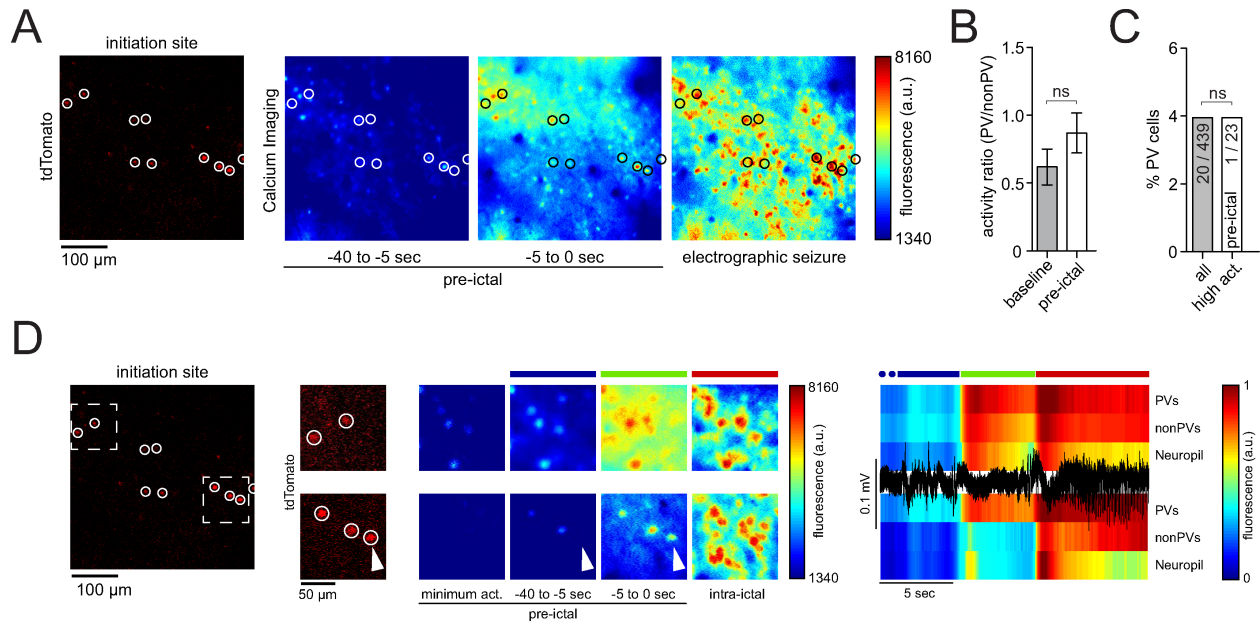

518

519 **Figure 5: Interneuronal recruitment inside the epileptic focus**

520 (A) Left: tdTomato-positive parvalbumin containing interneurons (PVs, red, encircled) imaged at  
 521 990 nm; calcium imaging (at 940 nm): fluorescence average images of pre-ictal and intra-ictal  
 522 neural activity (see also suppl. movie 4). (B) Activity ratio of PV versus non-PV sub-populations  
 523 during baseline and the 40-second period before seizure onset. Activity ratios were obtained by  
 524 dividing frame-sub-population-averaged positive change of  $\Delta F/F$  ( $n = 3$  experiments, all imaged  
 525 non-PVs = 439, all PVs = 20, 23 pre-ictal periods). During baseline (left), PVs continually display  
 526 lower values than non-PVs. This relationship is preserved during the pre-ictal period (right,  
 527 Mann Whitney test  $p=0,4$ ). (C) PV percentage among highest active neurons during pre-ictal  
 528 period ( $n = 3$  experiments, 23 pre-ictal periods, top 5% activity cells = 23) as compared to  
 529 general subtype distribution (Chi-Square test  $P(\chi^2 > 0.002) = 1,0151$ ). (D) Same experiment as  
 530 in A with two magnified inserts (see also suppl. movie 4.1 and 4.2) within distinct sub-territories.  
 531 Calcium imaging during saltatory micro-epileptic progression (middle); note again the diverse  
 532 recruitment of PVs to ictal activity (arrowhead). Colored bars above the calcium average images  
 533 correspond to the colored bars above the LFP trace (black) and population average calcium  
 534 traces (PVs, non-PVs and Neuropil) on the right.

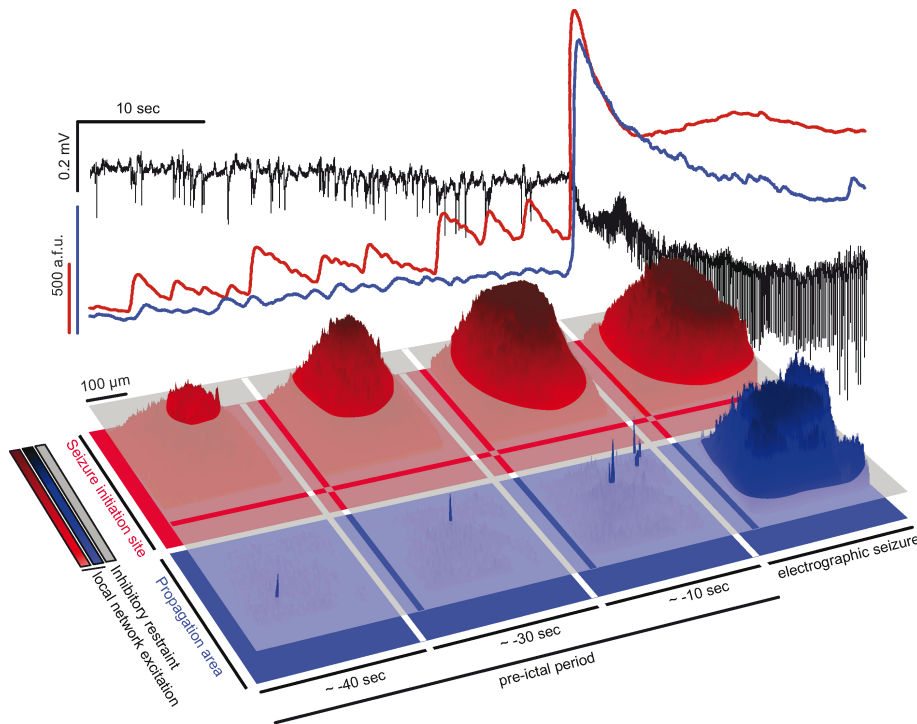

535

536 **Figure 6: Two-step seizure progression model**

537 Top panel: Depicted are 40 seconds of the pre-ictal period prior to electrographic seizure onset,  
538 and initial 20 seconds of a full ictal event. LFP (black), and corresponding intrafocal (red) and  
539 extrafocal (blue) average population calcium transient. Note how during the pre-ictal period,  
540 increasingly escalating population calcium events are only detected inside the epileptic focus,  
541 not in extrafocal territories. Lower panel: Corresponding to the population average signals  
542 shown above, 3-D surface calcium activity plots of imaged fields of view inside the epileptic  
543 focus (red) and within extrafocal territory (blue). The gray layer schematically represents local  
544 interneuron population activity. During microseizures in the pre-ictal period, inhibition fails at the  
545 level of local ensembles only inside the epileptic focus. Small patches of excitatory ensemble  
546 activity break through the layer of local inhibition. Micro-epileptic expansion over the 40-second  
547 pre-ictal period occurs in a saltatory, non-linear fashion, with increasingly large areas where  
548 inhibition has failed to restrain epileptic activity. This expansion happens in the absence of an  
549 ictal LFP signature. Once a local threshold is reached (whose nature remains unclear),

550 microseizures start spreading into neighboring territories outside the epileptic focus during  
551 electrographically detectable seizures, in a continuous fashion. Prior to this macro-epileptic  
552 expansion during electrographic seizures, little population activity can be detected in surround  
553 cortex, as opposed to intrafocal territories. This is due to increased feed-forward inhibition in  
554 extrafocal areas that is driven by pathological microepileptic activity inside the epileptic focus.  
555 Thus, seizure progression consists of consecutive steps, and may display differential  
556 spatiotemporal local network and sub-population dynamics highly depending on the localization  
557 of recording.

## 558 **Methods**

559 All experiments were performed with care and in compliance with the Columbia University  
560 institutional animal care guidelines. Experiments were carried out on either C57BL/6 wild type  
561 mice or PV-Cre::LSL-tdTomato mice at postnatal age of 1-3 months. Animals were never used  
562 for previous or subsequent experiments. Food and water was provided ad libitum. Mice were  
563 housed at a 12 hour light/dark cycle.

564 **Virus injections and surgical procedures.** Prior to actual experiments, animals were injected  
565 with AAV1-Syn-GCaMP6s (purchased from the University of Pennsylvania Vector Core). Mice  
566 were anesthetized with isoflurane (initial dose 2-3% partial pressure in air, then reduction to 1-  
567 1.5%). A small cranial aperture was established above left somatosensory cortex (coordinates  
568 from bregma: x 2,5mm, y -0,24mm, z -0,2mm) using a dental drill. A glass capillary pulled to a  
569 sharp micropipette was stereotactically lowered into cortical layer 2/3. A 800nl solution of 1:1  
570 diluted AAV1-Syn-GCaMP6s (Chen et al., 2013) was slowly injected over 5 min at a depth of  
571 200  $\mu$ m from the pial surface using a microinjector (World Precision Instruments). 4-5 weeks  
572 after virus injection, on the day of the experiment, mice were anesthetized with isoflurane (initial  
573 dose 2-3% partial pressure in air, then reduction to 1.0%). A small flap of skin above the skull  
574 was removed and a titanium head plate with a central foramen (7x7mm) was attached to the

575 skull with dental cement above the left hemisphere (Fig 1a). Then, a small craniotomy similar to  
576 previous descriptions (Miller et al., 2014) was carried out. Specifically, posterior to the virus  
577 injection site, the skull was circularly thinned using a dental drill until a small piece (circa 2mm in  
578 diameter) of skull could be removed effortlessly with fine forceps.

579 **Two-photon calcium imaging.** Activity of cortical neurons was recorded by imaging changes  
580 of fluorescence with a two-photon microscope (Bruker; Billerica, MA) and a Ti:Sapphire laser  
581 (Chameleon Ultra II; Coherent) at 940 nm through a 25x objective (water immersion, N.A. 1.05,  
582 Olympus). Resonant galvanometer scanning and image acquisition (frame rate 30 fps, 512 x  
583 512 pixels, 100-170  $\mu\text{m}$  beneath the pial surface) were controlled by Prairie View Imaging  
584 software. Multiple datasets were acquired consecutively over the course of an experiment  
585 (90,000-150,000 frames in total, with several momentary breaks interspersed for reasons of  
586 practicality). During the entire experiment, the head-restrained animals were kept under light  
587 isoflurane anesthesia (0.8-1% partial pressure in air) via a nose piece while body temperature  
588 was maintained with a warming pad (37.5°C).

589 **Ictal model and Electrophysiology.** The local 4-AP model of acute cortical seizures was used  
590 in this study, as it allowed the precise localization (on the order of micrometers) of the epileptic  
591 focus and surround cortex. In the context of the model used here, it is further noteworthy that  
592 seizure occurrence in chronic animal models of epilepsy is usually low (Arida et al., 1999; Ewell  
593 et al., 2015; Muldoon et al., 2015). It would require either multiple fortunate or prohibitively long  
594 imaging sessions of infrequently occurring full ictal events in order to capture a sufficient  
595 number of seizures, along with reasons concerned with potential tissue photo-damage,  
596 fluophore bleaching and hardware limitations. For local field potential (LFP) recordings, a sharp  
597 glass micropipette (2-5 M $\Omega$ ) filled with saline and containing a silver chloride wire was carefully  
598 advanced into the cortex (30° angle) under visual control to a depth of around 100  $\mu\text{m}$  beneath  
599 the pial surface. The pipette tip was positioned close by the imaged area (Fig. 1 A). A reference

600 electrode was positioned over the contralateral prefrontal cortex. LFP signals were amplified  
601 using a Multiclamp 700B amplifier (Axon Instruments, Sunnyvale, CA), low-pass filtered (300Hz,  
602 Multiclamp 700B commander software, Axon Instruments), digitized at 1 kHz (Bruker) and  
603 recorded using Prairie View Voltage Recording Software alongside with calcium imaging. For  
604 induction of ictal events, another sharp glass micropipette containing 4-Aminopyridine (4-AP,  
605 15mM, 0.5  $\mu$ l) was slowly lowered (30° angle) into the cortex to a depth of 420-480  $\mu$ m. The  
606 pipette tip was positioned at a distance of around 1.5-2 mm caudally to the imaged area.  
607 Correct positioning of the pipette tip was ensured by a diagonal dry-run within saline above the  
608 cortex preceding actual insertion. 4-AP was injected over the course of 10-15 min by use of a  
609 Micro4 Micro Syringe Pump Controller (World Precision Instruments). Electrographic seizure  
610 onset time points were determined mathematically by mean and standard deviation (std) of LFP  
611 recordings. The first time point exceeding  $> 5$  std from the interictal LFP mean power was  
612 defined as the seizure onset and confirmed by visual inspection.

613 **Image Analysis.** Cell regions of interest (ROIs) were identified in a semi-automated fashion by  
614 using custom written software in MATLAB (Caltracer 3 beta, available at our laboratory website:  
615 <http://www.columbia.edu/cu/biology/faculty/yuste/methods.html>) followed by manual  
616 confirmation. Because of pronounced and synchronous fluorescence changes of surround  
617 neuropil during epileptic conditions, halo subtraction procedures could lead to distortions of  
618 calcium transients of individual cells. Therefore, we applied ROI shrinkage (ROI soma outline  
619 minus 1.5 pixels radially), which has been successfully used to minimize bleed-in of surround  
620 neuropil fluorescence (Hofer et al., 2011). Cells with low signal to noise ratio or no apparent  
621 calcium transients were excluded from further analysis. Individual cells that were lost over the  
622 course of the experiment due to at times discrete axial movement of the imaged focal plane  
623 during local 4-AP injection were also excluded from further analysis. Individual cell fluorescence  
624 was calculated as the average across all pixels within the ROI.

625 **Cell Recruitment Analyses.** In order to determine the recruitment time-point of individual cells  
626 to ictal activity, we used the first discrete derivative (slope) of the individual fluorescent traces  
627 assuming that the sharpest change in fluorescence correlates best with maximal recruitment to  
628 ictal activity (Trevelyan et al., 2006; Wenzel et al., 2017). Population recruitment durations were  
629 calculated as the time from the first to the last recruited registered cell, excluding the 5% most  
630 deviant cells to reduce outlier-induced duration distortions. Specific time lags of PV neural  
631 recruitment in comparison to local network recruitment to seizure activity were calculated as  
632 follows (Suppl. Fig. 3). First, we derived the median frame  $Y_{50}$  wherein the cumulative number of  
633 recruited cells first equaled or exceeded 50% of all registered neurons. Then, relative to this  $Y_{50}$ ,  
634 each PV was assigned a temporal recruitment lag by subtracting  $Y_{50}$  from its individual  
635 recruitment frame  $X_N$  ( $X_n - Y_{50}$ , a negative result would indicate an early recruitment of the  
636 respective PV ahead of the median population recruitment for a given seizure event).

637 **Spatiotemporal Clustering.** In order to identify spatio-temporo-progressive network activity  
638 motifs during progression of ictal activity, we ordered cell recruitment points in time (from early  
639 to late recruitment) during each individual ictal event of an experiment and divided each dataset  
640 into four groups (1-25%, 26-50%, 51-75%, 76-100%), as previously described (Wenzel et al.,  
641 2017). Then, the mean distance of cell coordinates (x,y within imaged area) of individual  
642 quartiles were calculated to either the mean coordinate of the respective quartile, or the mean  
643 coordinate of all recorded cells, for each seizure. Then, these distances were compared to each  
644 other. If cells' recruitment time points are similar and cells cluster spatially, their distance to the  
645 mean coordinate of their respective quartile should be significantly shorter than the mean  
646 distance to the mean coordinate of all cells which are distributed over the entire field of view  
647 (Suppl. Fig. 2 C).

648 **State Space.** We sought to parsimoniously describe multicellular network dynamics in a lower  
649 rank subspace amenable to visual display and linear comparisons. We calculated a principle

650 components analysis (PCA) on i) baseline (pre-injection) activity, ii) 40 second period prior to  
651 seizure onset, and iii) 3 seconds after seizure onset. We compared scree plots to quantify the  
652 proportion of variance accounted for by each component (Cattell, 1966), comparing root  
653 eigenvalues between conditions to assess an indication of dataset dimensionality, and, for  
654 plotting purposes, carried out a VARIMAX rotation to limit solutions to 3-6 components (based  
655 on scree plot).

656 **Statistics.** All data were analyzed using custom written code in MATLAB (MathWorks, Inc).  
657 Error bars on bar plots and shaded areas in graph plots indicate s.e.m.. To determine statistical  
658 significance for analyses regarding cell recruitment, Mann Whitney tests were applied unless  
659 stated otherwise. For statistical analysis of spatio-temporal clustering, we used bivariate  
660 ANOVA analysis of mean distance differences (df = 3). High activity subtype comparison (Fig. 4  
661 and 5) was determined by Chi-Square test (1 degree of freedom [df]).

#### 662 **Additional resources**

663 MOCO (ImageJ plugin for motion correction) and Caltracer (extraction of calcium signals) are  
664 available online on the Yuste laboratory web page:

665 <http://www.columbia.edu/cu/biology/faculty/yuste/methods.html>

#### 666 **Resource Table**

| <b>Experimental Models: mouse lines</b>      |                                                                                                                                           |                            |
|----------------------------------------------|-------------------------------------------------------------------------------------------------------------------------------------------|----------------------------|
| C57BL/6 wildtype                             | Jackson Laboratory                                                                                                                        | RRID:IMSR_JAX:00064        |
| PV-Cre                                       | Jackson Laboratory                                                                                                                        | RRID:IMSR_JAX:017320       |
| LSL-tdTomato                                 | Jackson Laboratory                                                                                                                        | RRID:IMSR_JAX:007908       |
| <b>Chemicals (Pharmacological compounds)</b> |                                                                                                                                           |                            |
| 4-Aminopyridine                              | Sigma-Aldrich                                                                                                                             | Cat # 275875; CAS:504-24-5 |
| <b>Recombinant DNA</b>                       |                                                                                                                                           |                            |
| AAV1-Syn-GCaMP6s-WPRE-SV40                   | U Penn Vector Core                                                                                                                        | Cat # AV-1-PV2824          |
| <b>Software and Algorithms</b>               |                                                                                                                                           |                            |
| ImageJ                                       | <a href="https://imagej.nih.gov/ij/">https://imagej.nih.gov/ij/</a>                                                                       |                            |
| Moco                                         | <a href="http://www.columbia.edu/cu/biology/faculty/yuste/methods.html">http://www.columbia.edu/cu/biology/faculty/yuste/methods.html</a> |                            |
| MATLAB(R2014b)                               | MathWorks                                                                                                                                 |                            |
| Caltracer3beta                               | <a href="http://www.columbia.edu/cu/biology/faculty/yuste/methods.html">http://www.columbia.edu/cu/biology/faculty/yuste/methods.html</a> |                            |
| Adobe Illustrator CS6                        | Adobe                                                                                                                                     |                            |

667

668   References

- 669   Adams, C., Adams, N.E., Traub, R.D., and Whittington, M.A. (2015). Electrographic waveform structure  
670   predicts laminar focus location in a model of temporal lobe seizures in vitro. *PLoS One* *10*, e0121676.  
671
- 672   Alfonsa, H., Merricks, E.M., Codadu, N.K., Cunningham, M.O., Deisseroth, K., Racca, C., and Trevelyan,  
673   A.J. (2015). The contribution of raised intraneuronal chloride to epileptic network activity. *J Neurosci* *35*,  
674   7715-7726.  
675
- 676   Arida, R.M., Scorza, F.A., Peres, C.A., and Cavalheiro, E.A. (1999). The course of untreated seizures in the  
677   pilocarpine model of epilepsy. *Epilepsy research* *34*, 99-107.  
678
- 679   Avoli, M., D'Antuono, M., Louvel, J., Kohling, R., Biagini, G., Pumain, R., D'Arcangelo, G., and Tancredi, V.  
680   (2002). Network and pharmacological mechanisms leading to epileptiform synchronization in the limbic  
681   system in vitro. *Prog Neurobiol* *68*, 167-207.  
682
- 683   Avoli, M., and de Curtis, M. (2011). GABAergic synchronization in the limbic system and its role in the  
684   generation of epileptiform activity. *Prog Neurobiol* *95*, 104-132.  
685
- 686   Avoli, M., Psarropoulou, C., Tancredi, V., and Fueta, Y. (1993). On the synchronous activity induced by 4-  
687   aminopyridine in the CA3 subfield of juvenile rat hippocampus. *J Neurophysiol* *70*, 1018-1029.  
688
- 689   Badea, T., Goldberg, J., Mao, B., and Yuste, R. (2001). Calcium imaging of epileptiform events with single-  
690   cell resolution. In *J Neurobiol*, pp. 215-227.  
691
- 692   Beleza, P. (2012). Acute symptomatic seizures: a clinically oriented review. *Neurologist* *18*, 109-119.  
693   Bezaire, M.J., and Soltesz, I. (2013). Quantitative assessment of CA1 local circuits: knowledge base for  
694   interneuron-pyramidal cell connectivity. *Hippocampus* *23*, 751-785.  
695
- 696   Bragin, A., Wilson, C.L., and Engel, J., Jr. (2000). Chronic epileptogenesis requires development of a  
697   network of pathologically interconnected neuron clusters: a hypothesis. *Epilepsia* *41 Suppl 6*, S144-152.  
698
- 699   Cammarota, M., Losi, G., Chiavegato, A., Zonta, M., and Carmignoto, G. (2013). Fast spiking interneuron  
700   control of seizure propagation in a cortical slice model of focal epilepsy. *The Journal of physiology* *591*,  
701   807-822.  
702
- 703   Cattell, R.B. (1966). The Scree Test For The Number Of Factors. *Multivariate Behavioral Research* *1*, 245-  
704   276.  
705
- 706   Chen, T.W., Wardill, T.J., Sun, Y., Pulver, S.R., Renninger, S.L., Baohan, A., Schreiter, E.R., Kerr, R.A.,  
707   Orger, M.B., Jayaraman, V., *et al.* (2013). Ultrasensitive fluorescent proteins for imaging neuronal  
708   activity. *Nature* *499*, 295-300.  
709
- 710   Ewell, L.A., Liang, L., Armstrong, C., Soltesz, I., Leutgeb, S., and Leutgeb, J.K. (2015). Brain State Is a Major  
711   Factor in Preseizure Hippocampal Network Activity and Influences Success of Seizure Intervention. *J*  
712   *Neurosci* *35*, 15635-15648.



- 713 Feldt Muldoon, S., Soltesz, I., and Cossart, R. (2013). Spatially clustered neuronal assemblies comprise  
714 the microstructure of synchrony in chronically epileptic networks. *Proc Natl Acad Sci U S A* *110*, 3567-  
715 3572.
- 716
- 717 Gnatkovsky, V., Librizzi, L., Trombin, F., and de Curtis, M. (2008). Fast activity at seizure onset is  
718 mediated by inhibitory circuits in the entorhinal cortex in vitro. *Ann Neurol* *64*, 674-686.
- 719
- 720 Goldensohn, E.S. (1975). Initiation and propagation of epileptogenic foci. *Advances in neurology* *11*, 141-  
721 162.
- 722
- 723 Grenier, F., Timofeev, I., and Steriade, M. (1998). Leading role of thalamic over cortical neurons during  
724 postinhibitory rebound excitation. *Proc Natl Acad Sci U S A* *95*, 13929-13934.
- 725
- 726 Hofer, S.B., Ko, H., Pichler, B., Vogelstein, J., Ros, H., Zeng, H., Lein, E., Lesica, N.A., and Mrsic-Flogel, T.D.  
727 (2011). Differential connectivity and response dynamics of excitatory and inhibitory neurons in visual  
728 cortex. *Nature neuroscience* *14*, 1045-1052.
- 729
- 730 Howe, J., Lu, X., Thompson, Z., Peterson, G.W., and Losey, T.E. (2016). Intraoperative seizures during  
731 craniotomy under general anesthesia. *Seizure* *38*, 23-25.
- 732
- 733 Huberfeld, G., Wittner, L., Clemenceau, S., Baulac, M., Kaila, K., Miles, R., and Rivera, C. (2007).  
734 Perturbed chloride homeostasis and GABAergic signaling in human temporal lobe epilepsy. *J Neurosci*  
735 *27*, 9866-9873.
- 736
- 737 Jirsa, V.K., Stacey, W.C., Quilichini, P.P., Ivanov, A.I., and Bernard, C. (2014). On the nature of seizure  
738 dynamics. *Brain* *137*, 2210-2230.
- 739
- 740 Kawaguchi, Y. (2001). Distinct firing patterns of neuronal subtypes in cortical synchronized activities. *J*  
741 *Neurosci* *21*, 7261-7272.
- 742
- 743 Krook-Magnuson, E., Armstrong, C., Oijala, M., and Soltesz, I. (2013). On-demand optogenetic control of  
744 spontaneous seizures in temporal lobe epilepsy. *Nature communications* *4*, 1376.
- 745
- 746 Ledri, M., Madsen, M.G., Nikitidou, L., Kirik, D., and Kokaia, M. (2014). Global optogenetic activation of  
747 inhibitory interneurons during epileptiform activity. *J Neurosci* *34*, 3364-3377.
- 748
- 749 Lillis, K.P., Wang, Z., Mail, M., Zhao, G.Q., Berdichevsky, Y., Bacskai, B., and Staley, K.J. (2015). Evolution  
750 of Network Synchronization during Early Epileptogenesis Parallels Synaptic Circuit Alterations. *J Neurosci*  
751 *35*, 9920-9934.
- 752
- 753 Liou, J.-Y.M., H.; Wenzel, M.; Zhao, M; Baird-Daniel, E; Smith, ES.; Daniel, A; Emerson, R.G.; Yuste,R.;  
754 Schwartz, TH.; Schevon,C. (2018). Role of inhibitory control in modulating spread of focal ictal activity.  
755 *Brain : a journal of neurology*.
- 756
- 757 Lopes da Silva, F., Blanes, W., Kalitzin, S.N., Parra, J., Suffczynski, P., and Velis, D.N. (2003). Epilepsies as  
758 dynamical diseases of brain systems: basic models of the transition between normal and epileptic  
759 activity. *Epilepsia* *44 Suppl 12*, 72-83.

- 760 Ma, H., Zhao, M., and Schwartz, T.H. (2013). Dynamic neurovascular coupling and uncoupling during ictal  
761 onset, propagation, and termination revealed by simultaneous in vivo optical imaging of neural activity  
762 and local blood volume. *Cereb Cortex* 23, 885-899.  
763
- 764 Madisen, L., Zwingman, T.A., Sunkin, S.M., Oh, S.W., Zariwala, H.A., Gu, H., Ng, L.L., Palmiter, R.D.,  
765 Hawrylycz, M.J., Jones, A.R., *et al.* (2010). A robust and high-throughput Cre reporting and  
766 characterization system for the whole mouse brain. *Nature neuroscience* 13, 133-140.  
767
- 768 Miller, J.E., Ayzenshtat, I., Carrillo-Reid, L., and Yuste, R. (2014). Visual stimuli recruit intrinsically  
769 generated cortical ensembles. *Proceedings of the National Academy of Sciences of the United States of*  
770 *America* 111, E4053-4061.  
771
- 772 Milton, J.G., Chkhenkeli, S.A., and Towle, V.L. (2007). Brain Connectivity and the Spread of Epileptic  
773 Seizures. ed A R McIntosh Viktor K Jirsa (*Handbook on Brain Connectivity; Heidelberg: Springer*).  
774
- 775 Muldoon, S.F., Villette, V., Tressard, T., Malvache, A., Reichinnek, S., Bartolomei, F., and Cossart, R.  
776 (2015). GABAergic inhibition shapes interictal dynamics in awake epileptic mice. *Brain* 138(Pt 10):2875-  
777 90
- 778
- 779 Neubauer, F.B., Sederberg, A., and MacLean, J.N. (2014). Local changes in neocortical circuit dynamics  
780 coincide with the spread of seizures to thalamus in a model of epilepsy. *Front Neural Circuits* 8, 101.  
781
- 782 Neumann, A., Raedt, R., Steenland, H.W., Sprengers, M., Bzymek, K., Navratilova, Z., Mesina, L., Xie, J.,  
783 Lapointe, V., Kloosterman, F., *et al.* (2017). Involvement of fast-spiking cells in ictal sequences during  
784 spontaneous seizures in rats with chronic temporal lobe epilepsy. *Brain Volume* 140, 2355–2369.  
785
- 786 Pallud, J., Le Van Quyen, M., Bielle, F., Pellegrino, C., Varlet, P., Cresto, N., Baulac, M., Duyckaerts, C.,  
787 Kourdougli, N., Chazal, G., *et al.* (2014). Cortical GABAergic excitation contributes to epileptic activities  
788 around human glioma. *Sci Transl Med* 6, 244ra289.  
789
- 790 Paz, J.T., and Huguenard, J.R. (2015). Microcircuits and their interactions in epilepsy: is the focus out of  
791 focus? *Nat Neurosci* 18, 351-359.  
792
- 793 Pfeffer, C.K., Xue, M., He, M., Huang, Z.J., and Scanziani, M. (2013). Inhibition of inhibition in visual  
794 cortex: the logic of connections between molecularly distinct interneurons. *Nature neuroscience* 16,  
795 1068-1076.  
796
- 797 Pi, H.J., Hangya, B., Kvitsiani, D., Sanders, J.I., Huang, Z.J., and Kepecs, A. (2013). Cortical interneurons  
798 that specialize in disinhibitory control. *Nature* 503, 521-524.  
799
- 800 Prince, D.A., and Wilder, B.J. (1967). Control mechanisms in cortical epileptogenic foci. "Surround"  
801 inhibition. *Archives of neurology* 16, 194-202.  
802
- 803 Rossi, L.F., Wykes, R.C., Kullmann, D.M., and Carandini, M. (2017). Focal cortical seizures start as  
804 standing waves and propagate respecting homotopic connectivity. *Nature communications* 8, 217.  
805

- 806 Schevon, C.A., Ng, S.K., Cappell, J., Goodman, R.R., McKhann, G., Jr., Waziri, A., Branner, A., Sosunov, A.,  
807 Schroeder, C.E., and Emerson, R.G. (2008). Microphysiology of epileptiform activity in human neocortex.  
808 *Journal of clinical neurophysiology : official publication of the American Electroencephalographic Society*  
809 *25*, 321-330.
- 810
- 811 Schevon, C.A., Weiss, S.A., McKhann, G., Jr., Goodman, R.R., Yuste, R., Emerson, R.G., and Trevelyan, A.J.  
812 (2012). Evidence of an inhibitory restraint of seizure activity in humans. *Nature communications* *3*, 1060.  
813
- 814 Schwartz, T.H., and Bonhoeffer, T. (2001). In vivo optical mapping of epileptic foci and surround  
815 inhibition in ferret cerebral cortex. *Nat Med* *7*, 1063-1067.
- 816
- 817 Sessolo, M., Marcon, I., Bovetti, S., Losi, G., Cammarota, M., Ratto, G.M., Fellin, T., and Carmignoto, G.  
818 (2015). Parvalbumin-Positive Inhibitory Interneurons Oppose Propagation But Favor Generation of Focal  
819 Epileptiform Activity. *J Neurosci* *35*, 9544-9557.
- 820
- 821 Shiri, Z., Manseau, F., Levesque, M., Williams, S., and Avoli, M. (2015). Interneuron activity leads to  
822 initiation of low-voltage fast-onset seizures. *Ann Neurol* *77*, 541-546.
- 823
- 824 Sik, A., Penttonen, M., Ylinen, A., and Buzsaki, G. (1995). Hippocampal CA1 interneurons: an in vivo  
825 intracellular labeling study. *J Neurosci* *15*, 6651-6665.
- 826
- 827 Smetters, D., Majewska, A., and Yuste, R. (1999). Detecting action potentials in neuronal populations  
828 with calcium imaging. *Methods* *18*, 215-221.
- 829
- 830 Stead, M., Bower, M., Brinkmann, B.H., Lee, K., Marsh, W.R., Meyer, F.B., Litt, B., Van Gompel, J., and  
831 Worrell, G.A. (2010). Microseizures and the spatiotemporal scales of human partial epilepsy. *Brain* *133*,  
832 2789-2797.
- 833
- 834 Szente, M., and Pongracz, F. (1979). Aminopyridine-induced seizure activity. *Electroencephalogr Clin*  
835 *Neurophysiol* *46*, 605-608.
- 836
- 837 Tashiro, A., Goldberg, J., and Yuste, R. (2002). Calcium oscillations in neocortical astrocytes under  
838 epileptiform conditions. *J Neurobiol* *50*, 45-55.
- 839
- 840 Timofeev, I., Grenier, F., and Steriade, M. (2002). The role of chloride-dependent inhibition and the  
841 activity of fast-spiking neurons during cortical spike-wave electrographic seizures. *Neuroscience* *114*,  
842 1115-1132.
- 843
- 844 Trevelyan, A.J., and Schevon, C.A. (2013). How inhibition influences seizure propagation.  
845 *Neuropharmacology* *69*, 45-54.
- 846
- 847 Trevelyan, A.J., Sussillo, D., Watson, B.O., and Yuste, R. (2006). Modular Propagation of Epileptiform  
848 Activity: Evidence for an Inhibitory Veto in Neocortex. In *Journal of Neuroscience*, pp. 12447-12455.  
849
- 850 Trevelyan, A.J., Sussillo, D., and Yuste, R. (2007). Feedforward Inhibition Contributes to the Control of  
851 Epileptiform Propagation Speed. In *Journal of Neuroscience*, pp. 3383-3387.
- 852

- 853 Truccolo, W., Ahmed, O.J., Harrison, M.T., Eskandar, E.N., Cosgrove, G.R., Madsen, J.R., Blum, A.S.,  
854 Potter, N.S., Hochberg, L.R., and Cash, S.S. (2014). Neuronal ensemble synchrony during human focal  
855 seizures. *J Neurosci* *34*, 9927-9944.
- 856 Truccolo, W., Donoghue, J.A., Hochberg, L.R., Eskandar, E.N., Madsen, J.R., Anderson, W.S., Brown, E.N.,  
857 Halgren, E., and Cash, S.S. (2011). Single-neuron dynamics in human focal epilepsy. *Nat Neurosci* *14*,  
858 635-641.
- 859
- 860 Ulkatan, S., Jaramillo, A.M., Tellez, M.J., Kim, J., Deletis, V., and Seidel, K. (2017). Incidence of  
861 intraoperative seizures during motor evoked potential monitoring in a large cohort of patients  
862 undergoing different surgical procedures. *Journal of neurosurgery* *126*, 1296-1302.
- 863
- 864 Uva, L., Trombin, F., Carriero, G., Avoli, M., and de Curtis, M. (2013). Seizure-like discharges induced by  
865 4-aminopyridine in the olfactory system of the in vitro isolated guinea pig brain. *Epilepsia* *54*, 605-615.
- 866
- 867 Wadman, W.J., and Gutnick, M.J. (1993). Non-uniform propagation of epileptiform discharge in brain  
868 slices of rat neocortex. *Neuroscience* *52*, 255-262.
- 869
- 870 Wenzel, M., Hamm, J.P., Peterka, D.S., and Yuste, R. (2017). Reliable and Elastic Propagation of Cortical  
871 Seizures In Vivo. *Cell Rep* *19*, 2681-2693.
- 872
- 873 Worrell, G.A., Gardner, A.B., Stead, S.M., Hu, S., Goerss, S., Cascino, G.J., Meyer, F.B., Marsh, R., and Litt,  
874 B. (2008). High-frequency oscillations in human temporal lobe: simultaneous microwire and clinical  
875 macroelectrode recordings. *Brain* *131*, 928-937.
- 876
- 877 Yuste, R., and Katz, L.C. (1991). Control of postsynaptic Ca<sup>2+</sup> influx in developing neocortex by excitatory  
878 and inhibitory neurotransmitters. *Neuron* *6*, 333-344.
- 879
- 880 Zhao, M., Nguyen, J., Ma, H., Nishimura, N., Schaffer, C.B., and Schwartz, T.H. (2011). Preictal and ictal  
881 neurovascular and metabolic coupling surrounding a seizure focus. *The Journal of Neuroscience* *31*,  
882 13292-13300.
- 883
- 884 Ziburkus, J., Cressman, J.R., Barreto, E., and Schiff, S.J. (2006). Interneuron and pyramidal cell interplay  
885 during in vitro seizure-like events. *J Neurophysiol* *95*, 3948-3954.
- 886
